# Supplementary material
Source: PubMed Central journal article supplement (PMC3515819)
Supplement: tjp0590-5273-SD1.pdf [file tjp0590-5273-SD1.pdf]

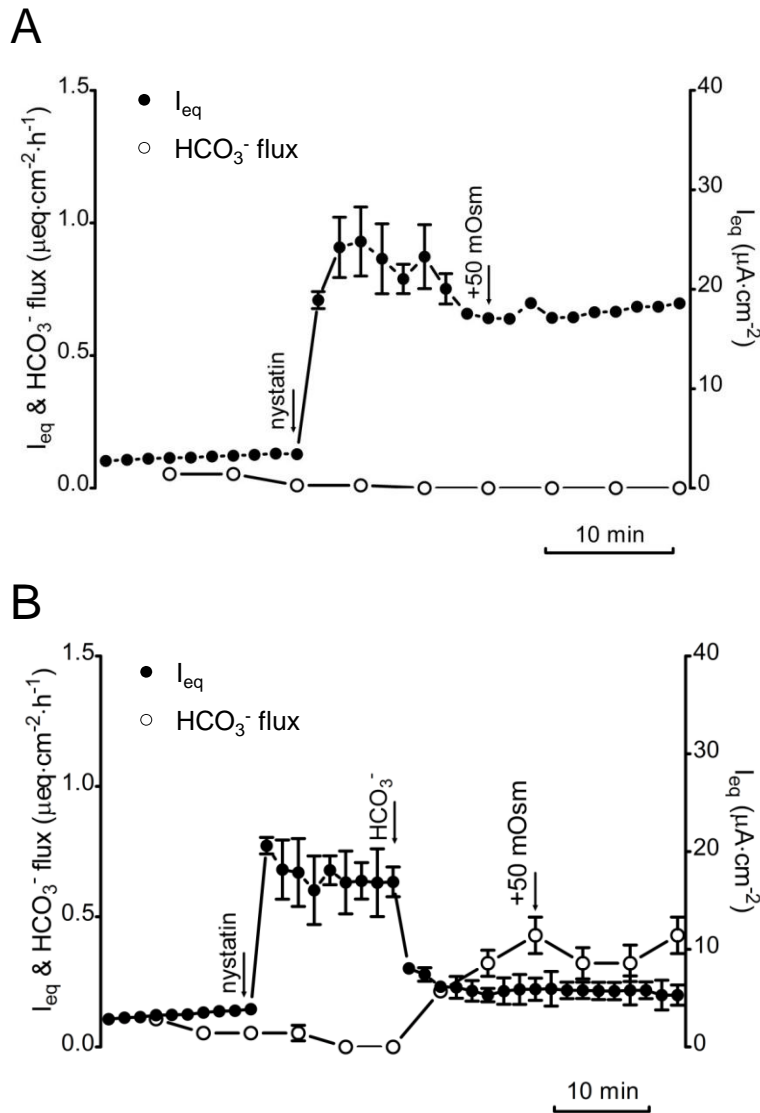

**Supplementary Fig. 1. Effects of osmotic gradients on  $I_{eq}$  and  $HCO_3^-$  secretion (controls for Fig.8).** *A*, monolayers were bathed initially in symmetrical  $HCO_3^-$ -free solution under open circuit conditions. Nystatin ( $360 \mu g ml^{-1}$ ) was added on the apical side to permeabilize the apical membrane. Subsequent addition of  $50 mmol l^{-1}$  mannitol to the apical side (+50 mOsm) did not alter  $I_{eq}$ . *B*, after permeabilizing the apical membrane and imposing a  $HCO_3^-$  gradient, further addition of  $50 mmol l^{-1}$  mannitol did not influence the  $HCO_3^-$  flux mediated by basolateral anion exchange.
